# Supplementary material for: High-pressure and high-temperature structure and equation of state of Na&lt;sub&gt;3&lt;/sub&gt;Ca&lt;sub&gt;2&lt;/sub&gt;La(CO&lt;sub&gt;3&lt;/sub&gt;)&lt;sub&gt;5&lt;/sub&gt; burbankite
Source: Copernicus journal article supplement (doi:10.5194/ejm-34-351-2022), 2022-06-13
Supplement: Supplementary file 1 [file ejm-34-351-2022-supplement.zip]

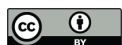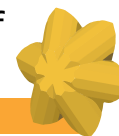

*Supplement of*

**High-pressure and high-temperature structure and equation  
of state of  $\text{Na}_3\text{Ca}_2\text{La}(\text{CO}_3)_5$  burbankite**

**Sula Milani et al.**

*Correspondence to:* Sula Milani ([sula.milani@unimi.it](mailto:sula.milani@unimi.it))

- [ejm-34-351-2022-supplement-title-page.pdf](#)
- [supplement](#)
  - [burbankite.cif](#)
  - [supplement\\_postproduction.pdf](#)

The copyright of individual parts of the supplement might differ from the article licence.
