# Supplementary material for: High-pressure and high-temperature structure and equation of state of Na&lt;sub&gt;3&lt;/sub&gt;Ca&lt;sub&gt;2&lt;/sub&gt;La(CO&lt;sub&gt;3&lt;/sub&gt;)&lt;sub&gt;5&lt;/sub&gt; burbankite
Source: Copernicus journal article supplement (doi:10.5194/ejm-34-351-2022), 2022-06-13
Supplement: Supplementary file 2 [file ejm-34-351-2022-supplement.zip]

Archive with 4 entries (3 files):
- supplement/
- supplement/supplement_postproduction.pdf
- supplement/burbankite.cif
- ejm-34-351-2022-supplement-title-page.pdf
