# Supplementary material for: High-pressure and high-temperature structure and equation of state of Na&lt;sub&gt;3&lt;/sub&gt;Ca&lt;sub&gt;2&lt;/sub&gt;La(CO&lt;sub&gt;3&lt;/sub&gt;)&lt;sub&gt;5&lt;/sub&gt; burbankite
Source: Copernicus journal article supplement (doi:10.5194/ejm-34-351-2022), 2022-06-13
Supplement: Supplementary file 2 [file ejm-34-351-2022-supplement.zip › supplement/burbankite.cif]

#=======================================================================
data_synthetic_burbankite_ambient_pressure_(P)_and_temperature_(T)
#=======================================================================

# Chemical data 
_chemical_formula_sum                    'Na3 Ca2 La C5 O15'
_chemical_formula_weight                 588.075
_chemical_formula_analytical		 'Na2.41(14) Ca2.39(5) La0.94(3) C5 O15'
_chemical_name_mineral                   burbankite
_chemical_compound_source                'synthesised at 5 GPa and 1073 K'

# Unit cell
_cell_formula_units_Z                    1
_cell_length_a                           10.4238(2)
_cell_length_b                           10.4238(2)
_cell_length_c                           6.2910(2)
_cell_angle_alpha                        90
_cell_angle_beta                         90
_cell_angle_gamma                        120
_cell_volume                             591.97(2)
_cell_measurement_temperature            298(2)
_cell_measurement_pressure               1000(100)

# Experimental details 
_diffrn_ambient_temperature              298(2)
_diffrn_ambient_pressure                 100(5)
_diffrn_radiation_probe                  X-ray
_diffrn_radiation_type                   'Mo K\a'
_diffrn_radiation_wavelength             0.71073
_diffrn_radiation_monochromator          graphite
_diffrn_measurement_device               '4-circle goniometer'
_diffrn_measurement_device_type          'Rigaku XtaLAB Synergy'

# Symmetry information
_symmetry_cell_setting                   hexagonal
_symmetry_space_group_name_H-M           'P 63 m c'
loop_
 _space_group_symop_operation_xyz
   x,y,z
   -y,x-y,z
   -x+y,-x,z
   -x,-y,z+1/2
   y,-x+y,z+1/2
   x-y,x,z+1/2
   -y,-x,z
   -x+y,y,z
   x,x-y,z
   y,x,z+1/2
   x-y,-y,z+1/2
   -x,-x+y,z+1/2

# Structural data
loop_
 _atom_site_label
 _atom_site_type_symbol
 _atom_site_fract_x
 _atom_site_fract_y
 _atom_site_fract_z
 _atom_site_adp_type
 _atom_site_U_iso_or_equiv
 _atom_site_occupancy
  Ca1 Ca 0.84168(3) 0.68335(5) 0.691(6) Uani 0.01263(16) 0.768(4) 
  La1 La 0.84168(3) 0.68335(5) 0.691(6) Uani 0.01263(16) 0.232(4) 
  Na2 Na 0.52317(10) 0.04634(19) 0.379(6) Uani 0.0171(7) 0.909(14)
  Ca2 Ca 0.52317(10) 0.04634(19) 0.379(6) Uani 0.0171(7) 0.091(14)
  O1 O 0.8092(4) 0.40462(18) 0.711(6) Uani 0.0238(11) 1
  O2 O 0.77651(18) 0.5530(4) 0.342(6) Uani 0.0176(11) 1
  O3 O 0.6322(3) 0.7093(3) 0.558(6) Uani 0.0188(9) 1 
  C1 C 0.666667 0.333333 0.712(6) Uani 0.0142(19) 1 
  O4 O 0.1408(4) 0.07042(18) 0.354(6) Uani 0.0302(13) 1 
  C2 C 0 0 0.358(6) Uani 0.0150(17) 1
  C3 C 0.3946(5) 0.1973(2) 0.155(6) Uani 0.0128(13) 1

#=======================================================================
data_synthetic_burbankite_ambient_P_and_T_at_synchrotron_HP_ramp
#=======================================================================

# Chemical data 
_chemical_formula_sum                    'Na3 Ca2 La C5 O15'
_chemical_formula_weight                 588.075
_chemical_formula_analytical		 'Na2.41(14) Ca2.39(5) La0.94(3) C5 O15'
_chemical_name_mineral                   burbankite
_chemical_compound_source                'synthesised at 5 GPa and 1073 K'

# Unit cell
_cell_formula_units_Z                    1
_cell_length_a                           10.4301(2)
_cell_length_b                           10.4301(2)
_cell_length_c                           6.2966(1)
_cell_angle_alpha                        90
_cell_angle_beta                         90
_cell_angle_gamma                        120
_cell_volume                             593.22(2)
_cell_measurement_temperature            298(2)
_cell_measurement_pressure               1000(100)

# Experimental details 
_diffrn_ambient_temperature              298(2)
_diffrn_ambient_pressure                 100(5)
_diffrn_radiation_probe                  X-ray
_diffrn_radiation_type                   synchrotron
_diffrn_radiation_wavelength             0.49450
_diffrn_measurement_device_type          'Xpress beamline, Elettra'

# Symmetry information
_symmetry_cell_setting                   hexagonal
_symmetry_space_group_name_H-M           'P 63 m c'
loop_
 _space_group_symop_operation_xyz
   x,y,z
   -y,x-y,z
   -x+y,-x,z
   -x,-y,z+1/2
   y,-x+y,z+1/2
   x-y,x,z+1/2
   -y,-x,z
   -x+y,y,z
   x,x-y,z
   y,x,z+1/2
   x-y,-y,z+1/2
   -x,-x+y,z+1/2

# Structural data
loop_
 _atom_site_label
 _atom_site_type_symbol
 _atom_site_fract_x
 _atom_site_fract_y
 _atom_site_fract_z
 _atom_site_adp_type
 _atom_site_U_iso_or_equiv
 _atom_site_occupancy
  La1 La 0.31674(9) 0.15837(4) 0.084(6) Uiso 0.0165(4) 0.262(11)
  O1 O 0.4477(7) 0.2238(3) -0.264(6) Uiso 0.0209(12) 1
  O2 O 0.3686(5) 0.0774(5) -0.549(6) Uiso 0.0218(9) 1 
  O3 O 0.5956(4) 0.1911(7) 0.104(6) Uiso 0.0255(13) 1
  O4 O 0.1385(8) 0.0692(4) -0.254(6) Uiso 0.0331(16) 1
  C1 C 0.3957(8) 0.1978(4) -0.452(6) Uiso 0.0166(13) 1
  C2 C 0.666667 0.333333 0.102(6) Uiso 0.021(2) 1
  C3 C 0 0 -0.248(6) Uiso 0.018(2) 1 
  Ca1 Ca 0.31674(9) 0.15837(4) 0.084(6) Uiso 0.0165(4) 0.738(11)
  Ca2 Ca 0.47665(19) -0.0467(4) -0.728(6) Uiso 0.0236(17) 0.15(5)
  Na2 Na 0.47665(19) -0.0467(4) -0.728(6) Uiso 0.0236(17) 0.85(5)


#=======================================================================
data_synthetic_burbankite_P_0.16_GPa_and_ambient_T
#=======================================================================


# Chemical data 
_chemical_formula_sum                    'Na3 Ca2 La C5 O15'
_chemical_formula_weight                 588.075
_chemical_formula_analytical		 'Na2.41(14) Ca2.39(5) La0.94(3) C5 O15'
_chemical_name_mineral                   burbankite
_chemical_compound_source                'synthesised at 5 GPa and 1073 K'

# Unit cell
_cell_formula_units_Z                    1
_cell_length_a                           10.4273(3)
_cell_length_b                           10.4273(3)
_cell_length_c                           6.2863(7)
_cell_angle_alpha                        90
_cell_angle_beta                         90
_cell_angle_gamma                        120
_cell_volume                             591.93(7)
_cell_measurement_temperature            298(2)
_cell_measurement_pressure               160000(50000)

# Experimental details 
_diffrn_ambient_temperature              298(2)
_diffrn_ambient_pressure                 160000(50000)
_diffrn_radiation_probe                  X-ray
_diffrn_radiation_type                   synchrotron
_diffrn_radiation_wavelength             0.49450
_diffrn_measurement_device_type          'Xpress beamline, Elettra'

# Symmetry information
_symmetry_cell_setting                   hexagonal
_symmetry_space_group_name_H-M           'P 63 m c'
loop_
 _space_group_symop_operation_xyz
   x,y,z
   -y,x-y,z
   -x+y,-x,z
   -x,-y,z+1/2
   y,-x+y,z+1/2
   x-y,x,z+1/2
   -y,-x,z
   -x+y,y,z
   x,x-y,z
   y,x,z+1/2
   x-y,-y,z+1/2
   -x,-x+y,z+1/2

# Structural data
loop_
 _atom_site_label
 _atom_site_type_symbol
 _atom_site_fract_x
 _atom_site_fract_y
 _atom_site_fract_z
 _atom_site_adp_type
 _atom_site_U_iso_or_equiv
 _atom_site_occupancy
  La1 La 0.31723(8) 0.15861(4) 0.084(10) Uiso 0.0111(3) 0.281(7)
  O1 O 0.4469(6) 0.2235(3) -0.265(10) Uiso 0.0154(13) 1
  O2 O 0.3690(4) 0.0775(4) -0.549(10) Uiso 0.0152(9) 1
  O3 O 0.5962(3) 0.1925(6) 0.102(10) Uiso 0.0244(15) 1
  O4 O 0.1421(6) 0.0711(3) -0.251(10) Uiso 0.0243(15) 1
  C1 C 0.3951(6) 0.1976(3) -0.454(10) Uiso 0.0083(12) 1
  C2 C 0.666667 0.333333 0.092(12) Uiso 0.023(3) 1
  C3 C 0 0 -0.246(10) Uiso 0.018(3) 1
  Ca1 Ca 0.31723(8) 0.15861(4) 0.084(10) Uiso 0.0111(3) 0.719(7)
  Ca2 Ca 0.47713(14) -0.0457(3) -0.728(10) Uiso 0.0124(11) 0.07(2)
  Na2 Na 0.47713(14) -0.0457(3) -0.728(10) Uiso 0.0124(11) 0.93(2)

#=======================================================================
data_synthetic_burbankite_P_0.54_GPa_and_ambient_T
#=======================================================================


# Chemical data 
_chemical_formula_sum                    'Na3 Ca2 La C5 O15'
_chemical_formula_weight                 588.075
_chemical_formula_analytical		 'Na2.41(14) Ca2.39(5) La0.94(3) C5 O15'
_chemical_name_mineral                   burbankite
_chemical_compound_source                'synthesised at 5 GPa and 1073 K'

# Unit cell
_cell_formula_units_Z                    1
_cell_length_a                           10.4083(2)
_cell_length_b                           10.4083(2)
_cell_length_c                           6.2824(5)
_cell_angle_alpha                        90
_cell_angle_beta                         90
_cell_angle_gamma                        120
_cell_volume                             589.41(5)
_cell_measurement_temperature            298(2)
_cell_measurement_pressure               540000(50000)

# Experimental details 
_diffrn_ambient_temperature              298(2)
_diffrn_ambient_pressure                 540000(50000)
_diffrn_radiation_probe                  X-ray
_diffrn_radiation_type                   synchrotron
_diffrn_radiation_wavelength             0.49450
_diffrn_measurement_device_type          'Xpress beamline, Elettra'

# Symmetry information
_symmetry_cell_setting                   hexagonal
_symmetry_space_group_name_H-M           'P 63 m c'
loop_
 _space_group_symop_operation_xyz
   x,y,z
   -y,x-y,z
   -x+y,-x,z
   -x,-y,z+1/2
   y,-x+y,z+1/2
   x-y,x,z+1/2
   -y,-x,z
   -x+y,y,z
   x,x-y,z
   y,x,z+1/2
   x-y,-y,z+1/2
   -x,-x+y,z+1/2

# Structural data
loop_
 _atom_site_label
 _atom_site_type_symbol
 _atom_site_fract_x
 _atom_site_fract_y
 _atom_site_fract_z
 _atom_site_adp_type
 _atom_site_U_iso_or_equiv
 _atom_site_occupancy
  La1 La 0.31743(7) 0.15872(4) 0.084(10) Uiso 0.0113(3) 0.238(8)
  O1 O 0.4492(6) 0.2246(3) -0.267(10) Uiso 0.0173(11) 1
  O2 O 0.3679(4) 0.0765(4) -0.553(10) Uiso 0.0165(9) 1
  O3 O 0.5949(3) 0.1898(6) 0.096(10) Uiso 0.0290(14) 1
  O4 O 0.1418(7) 0.0709(3) -0.257(10) Uiso 0.0291(15) 1
  C1 C 0.3931(7) 0.1966(3) -0.454(10) Uiso 0.0129(13) 1
  C2 C 0.666667 0.333333 0.112(11) Uiso 0.016(3) 1
  C3 C 0 0 -0.255(11) Uiso 0.012(2) 1
  Ca1 Ca 0.31743(7) 0.15872(4) 0.084(10) Uiso 0.0113(3) 0.762(8)
  Na2 Na 0.47711(14) -0.0458(3) -0.729(10) Uiso 0.0046(15) 1

#=======================================================================
data_synthetic_burbankite_P_1.24_GPa_and_ambient_T
#=======================================================================


# Chemical data 
_chemical_formula_sum                    'Na3 Ca2 La C5 O15'
_chemical_formula_weight                 588.075
_chemical_formula_analytical		 'Na2.41(14) Ca2.39(5) La0.94(3) C5 O15'
_chemical_name_mineral                   burbankite
_chemical_compound_source                'synthesised at 5 GPa and 1073 K'

# Unit cell
_cell_formula_units_Z                    1
_cell_length_a                           10.3727(2)
_cell_length_b                           10.3727(2)
_cell_length_c                           6.2561(6)
_cell_angle_alpha                        90
_cell_angle_beta                         90
_cell_angle_gamma                        120
_cell_volume                             582.93(6)
_cell_measurement_temperature            298(2)
_cell_measurement_pressure               1240000(50000)

# Experimental details 
_diffrn_ambient_temperature              298(2)
_diffrn_ambient_pressure                 1240000(50000)
_diffrn_radiation_probe                  X-ray
_diffrn_radiation_type                   synchrotron
_diffrn_radiation_wavelength             0.49450
_diffrn_measurement_device_type          'Xpress beamline, Elettra'

# Symmetry information
_symmetry_cell_setting                   hexagonal
_symmetry_space_group_name_H-M           'P 63 m c'
loop_
 _space_group_symop_operation_xyz
   x,y,z
   -y,x-y,z
   -x+y,-x,z
   -x,-y,z+1/2
   y,-x+y,z+1/2
   x-y,x,z+1/2
   -y,-x,z
   -x+y,y,z
   x,x-y,z
   y,x,z+1/2
   x-y,-y,z+1/2
   -x,-x+y,z+1/2

# Structural data
loop_
 _atom_site_label
 _atom_site_type_symbol
 _atom_site_fract_x
 _atom_site_fract_y
 _atom_site_fract_z
 _atom_site_adp_type
 _atom_site_U_iso_or_equiv
 _atom_site_occupancy
  La1 La 0.31796(6) 0.15898(3) 0.084(7) Uiso 0.0093(2) 0.265(6) 
  O1 O 0.4485(5) 0.2242(2) -0.266(7) Uiso 0.0147(10) 1 
  O2 O 0.3695(3) 0.0779(3) -0.551(7) Uiso 0.0144(8) 1 
  O3 O 0.5950(2) 0.1900(5) 0.102(7) Uiso 0.0200(11) 1 
  O4 O 0.1416(5) 0.0708(2) -0.255(7) Uiso 0.0206(11) 1 
  C1 C 0.3956(5) 0.1978(3) -0.455(7) Uiso 0.0070(10) 1 
  C2 C 0.666667 0.333333 0.109(9) Uiso 0.014(2) 1 
  C3 C 0 0 -0.251(8) Uiso 0.013(2) 1 
  Ca1 Ca 0.31796(6) 0.15898(3) 0.084(7) Uiso 0.0093(2) 0.735(6) 
  Ca2 Ca 0.47683(11) -0.0463(2) -0.730(7) Uiso 0.0124(10) 0.09(2)
  Na2 Na 0.47683(11) -0.0463(2) -0.730(7) Uiso 0.0124(10) 0.91(2)

#=======================================================================
data_synthetic_burbankite_P_2.09_GPa_and_ambient_T
#=======================================================================


# Chemical data 
_chemical_formula_sum                    'Na3 Ca2 La C5 O15'
_chemical_formula_weight                 588.075
_chemical_formula_analytical		 'Na2.41(14) Ca2.39(5) La0.94(3) C5 O15'
_chemical_name_mineral                   burbankite
_chemical_compound_source                'synthesised at 5 GPa and 1073 K'

# Unit cell
_cell_formula_units_Z                    1
_cell_length_a                           10.3417(2)
_cell_length_b                           10.3417(2)
_cell_length_c                           6.2337(7)
_cell_angle_alpha                        90
_cell_angle_beta                         90
_cell_angle_gamma                        120
_cell_volume                             577.38(6)
_cell_measurement_temperature            298(2)
_cell_measurement_pressure               2090000(50000)

# Experimental details 
_diffrn_ambient_temperature              298(2)
_diffrn_ambient_pressure                 2090000(50000)
_diffrn_radiation_probe                  X-ray
_diffrn_radiation_type                   synchrotron
_diffrn_radiation_wavelength             0.49450
_diffrn_measurement_device_type          'Xpress beamline, Elettra'

# Symmetry information
_symmetry_cell_setting                   hexagonal
_symmetry_space_group_name_H-M           'P 63 m c'
loop_
 _space_group_symop_operation_xyz
   x,y,z
   -y,x-y,z
   -x+y,-x,z
   -x,-y,z+1/2
   y,-x+y,z+1/2
   x-y,x,z+1/2
   -y,-x,z
   -x+y,y,z
   x,x-y,z
   y,x,z+1/2
   x-y,-y,z+1/2
   -x,-x+y,z+1/2

# Structural data
loop_
 _atom_site_label
 _atom_site_type_symbol
 _atom_site_fract_x
 _atom_site_fract_y
 _atom_site_fract_z
 _atom_site_adp_type
 _atom_site_U_iso_or_equiv
 _atom_site_occupancy
  La1 La 0.31851(8) 0.15926(4) 0.085(15) Uiso 0.0091(3) 0.275(8)
  O1 O 0.4510(6) 0.2255(3) -0.261(15) Uiso 0.0133(12) 1
  O2 O 0.3695(4) 0.0773(4) -0.551(15) Uiso 0.0129(9) 1
  O3 O 0.5950(3) 0.1899(5) 0.104(15) Uiso 0.0174(13) 1
  O4 O 0.1423(6) 0.0711(3) -0.257(15) Uiso 0.0176(13) 1
  C1 C 0.3968(6) 0.1984(3) -0.458(15) Uiso 0.0078(12) 1
  C2 C 0.666667 0.333333 0.101(16) Uiso 0.016(3) 1
  C3 C 0 0 -0.248(15) Uiso 0.014(2) 1
  Ca1 Ca 0.31851(8) 0.15926(4) 0.085(15) Uiso 0.0091(3) 0.725(8)
  Ca2 Ca 0.47695(13) -0.0461(3) -0.732(15) Uiso 0.0138(11) 0.15(3)
  Na2 Na 0.47695(13) -0.0461(3) -0.732(15) Uiso 0.0138(11) 0.85(3)

#=======================================================================
data_synthetic_burbankite_P_3.02_GPa_and_ambient_T
#=======================================================================


# Chemical data 
_chemical_formula_sum                    'Na3 Ca2 La C5 O15'
_chemical_formula_weight                 588.075
_chemical_formula_analytical		 'Na2.41(14) Ca2.39(5) La0.94(3) C5 O15'
_chemical_name_mineral                   burbankite
_chemical_compound_source                'synthesised at 5 GPa and 1073 K'

# Unit cell
_cell_formula_units_Z                    1
_cell_length_a                           10.3022(2)
_cell_length_b                           10.3022(2)
_cell_length_c                           6.1990(8)
_cell_angle_alpha                        90
_cell_angle_beta                         90
_cell_angle_gamma                        120
_cell_volume                             569.78(7)
_cell_measurement_temperature            298(2)
_cell_measurement_pressure               3020000(50000)

# Experimental details 
_diffrn_ambient_temperature              298(2)
_diffrn_ambient_pressure                 3020000(50000)
_diffrn_radiation_probe                  X-ray
_diffrn_radiation_type                   synchrotron
_diffrn_radiation_wavelength             0.49450
_diffrn_measurement_device_type          'Xpress beamline, Elettra'

# Symmetry information
_symmetry_cell_setting                   hexagonal
_symmetry_space_group_name_H-M           'P 63 m c'
loop_
 _space_group_symop_operation_xyz
   x,y,z
   -y,x-y,z
   -x+y,-x,z
   -x,-y,z+1/2
   y,-x+y,z+1/2
   x-y,x,z+1/2
   -y,-x,z
   -x+y,y,z
   x,x-y,z
   y,x,z+1/2
   x-y,-y,z+1/2
   -x,-x+y,z+1/2

# Structural data
loop_
 _atom_site_label
 _atom_site_type_symbol
 _atom_site_fract_x
 _atom_site_fract_y
 _atom_site_fract_z
 _atom_site_adp_type
 _atom_site_U_iso_or_equiv
 _atom_site_occupancy
  La1 La 0.31882(11) 0.15941(5) 0.084(14) Uiso 0.0110(5) 0.294(12)
  O1 O 0.4520(8) 0.2260(4) -0.263(14) Uiso 0.0136(17) 1
  O2 O 0.3705(6) 0.0769(6) -0.551(14) Uiso 0.0138(13) 1
  O3 O 0.5946(4) 0.1892(8) 0.107(14) Uiso 0.0170(17) 1
  O4 O 0.1439(8) 0.0719(4) -0.254(14) Uiso 0.0191(19) 1
  C1 C 0.3975(9) 0.1988(4) -0.453(14) Uiso 0.0087(17) 1
  C2 C 0.666667 0.333333 0.099(18) Uiso 0.015(3) 1
  C3 C 0 0 -0.242(15) Uiso 0.015(4) 1
  Ca1 Ca 0.31882(11) 0.15941(5) 0.084(14) Uiso 0.0110(5) 0.706(12)
  Ca2 Ca 0.47713(19) -0.0457(4) -0.731(14) Uiso 0.0100(19) 0.07(5)
  Na2 Na 0.47713(19) -0.0457(4) -0.731(14) Uiso 0.0100(19) 0.93(5)

#=======================================================================
data_synthetic_burbankite_P_3.70_GPa_and_ambient_T
#=======================================================================


# Chemical data 
_chemical_formula_sum                    'Na3 Ca2 La C5 O15'
_chemical_formula_weight                 588.075
_chemical_formula_analytical		 'Na2.41(14) Ca2.39(5) La0.94(3) C5 O15'
_chemical_name_mineral                   burbankite
_chemical_compound_source                'synthesised at 5 GPa and 1073 K'

# Unit cell
_cell_formula_units_Z                    1
_cell_length_a                           10.2881(4)
_cell_length_b                           10.2881(4)
_cell_length_c                           6.165(1)
_cell_angle_alpha                        90
_cell_angle_beta                         90
_cell_angle_gamma                        120
_cell_volume                             565.1(2)
_cell_measurement_temperature            298(2)
_cell_measurement_pressure               3700000(50000)

# Experimental details 
_diffrn_ambient_temperature              298(2)
_diffrn_ambient_pressure                 3700000(50000)
_diffrn_radiation_probe                  X-ray
_diffrn_radiation_type                   synchrotron
_diffrn_radiation_wavelength             0.49450
_diffrn_measurement_device_type          'Xpress beamline, Elettra'

# Symmetry information
_symmetry_cell_setting                   hexagonal
_symmetry_space_group_name_H-M           'P 63 m c'
loop_
 _space_group_symop_operation_xyz
   x,y,z
   -y,x-y,z
   -x+y,-x,z
   -x,-y,z+1/2
   y,-x+y,z+1/2
   x-y,x,z+1/2
   -y,-x,z
   -x+y,y,z
   x,x-y,z
   y,x,z+1/2
   x-y,-y,z+1/2
   -x,-x+y,z+1/2

# Structural data
loop_
 _atom_site_label
 _atom_site_type_symbol
 _atom_site_fract_x
 _atom_site_fract_y
 _atom_site_fract_z
 _atom_site_adp_type
 _atom_site_U_iso_or_equiv
 _atom_site_occupancy
  La1 La 0.31905(13) 0.15953(7) 0.084(6) Uiso 0.0150(7) 0.229(15)
  O1 O 0.4532(9) 0.2266(5) -0.270(8) Uiso 0.023(2) 1
  O2 O 0.3688(7) 0.0767(7) -0.553(7) Uiso 0.0207(15) 1
  O3 O 0.5942(5) 0.1883(10) 0.108(8) Uiso 0.027(2) 1
  O4 O 0.1415(9) 0.0708(5) -0.252(7) Uiso 0.026(2) 1
  C1 C 0.4002(11) 0.2001(5) -0.457(8) Uiso 0.014(2) 1
  C2 C 0.666667 0.333333 0.103(14) Uiso 0.023(4) 1
  C3 C 0 0 -0.256(10) Uiso 0.022(4) 1
  Ca1 Ca 0.31905(13) 0.15953(7) 0.084(6) Uiso 0.0150(7) 0.771(15)
  Na2 Na 0.4771(2) -0.0459(5) -0.730(6) Uiso 0.011(3) 1.10(6)

#=======================================================================
data_synthetic_burbankite_P_5.03_GPa_and_ambient_T
#=======================================================================


# Chemical data 
_chemical_formula_sum                    'Na3 Ca2 La C5 O15'
_chemical_formula_weight                 588.075
_chemical_formula_analytical		 'Na2.41(14) Ca2.39(5) La0.94(3) C5 O15'
_chemical_name_mineral                   burbankite
_chemical_compound_source                'synthesised at 5 GPa and 1073 K'

# Unit cell
_cell_formula_units_Z                    1
_cell_length_a                           10.2350(2)
_cell_length_b                           10.2350(2)
_cell_length_c                           6.139(1)
_cell_angle_alpha                        90
_cell_angle_beta                         90
_cell_angle_gamma                        120
_cell_volume                             556.9(1)
_cell_measurement_temperature            298(2)
_cell_measurement_pressure               5030000(50000)

# Experimental details 
_diffrn_ambient_temperature              298(2)
_diffrn_ambient_pressure                 5030000(50000)
_diffrn_radiation_probe                  X-ray
_diffrn_radiation_type                   synchrotron
_diffrn_radiation_wavelength             0.49450
_diffrn_measurement_device_type          'Xpress beamline, Elettra'

# Symmetry information
_symmetry_cell_setting                   hexagonal
_symmetry_space_group_name_H-M           'P 63 m c'
loop_
 _space_group_symop_operation_xyz
   x,y,z
   -y,x-y,z
   -x+y,-x,z
   -x,-y,z+1/2
   y,-x+y,z+1/2
   x-y,x,z+1/2
   -y,-x,z
   -x+y,y,z
   x,x-y,z
   y,x,z+1/2
   x-y,-y,z+1/2
   -x,-x+y,z+1/2

# Structural data
loop_
 _atom_site_label
 _atom_site_type_symbol
 _atom_site_fract_x
 _atom_site_fract_y
 _atom_site_fract_z
 _atom_site_adp_type
 _atom_site_U_iso_or_equiv
 _atom_site_occupancy
  La1 La 0.31965(11) 0.15982(6) 0.084(9) Uiso 0.0067(4) 0.271(11)
  O1 O 0.4541(8) 0.2270(4) -0.264(10) Uiso 0.0097(16) 1
  O2 O 0.3707(6) 0.0767(6) -0.551(9) Uiso 0.0112(13) 1
  O3 O 0.5944(4) 0.1888(7) 0.106(10) Uiso 0.0142(18) 1
  O4 O 0.1443(7) 0.0721(4) -0.256(10) Uiso 0.0115(17) 1
  C1 C 0.3978(9) 0.1989(5) -0.457(10) Uiso 0.0047(18) 1
  C2 C 0.666667 0.333333 0.107(14) Uiso 0.011(4) 1
  C3 C 0 0 -0.256(11) Uiso 0.006(3) 1
  Ca1 Ca 0.31965(11) 0.15982(6) 0.084(9) Uiso 0.0067(4) 0.729(11)
  Ca2 Ca 0.47711(19) -0.0458(4) -0.732(9) Uiso 0.0089(14) 0.09(3)
  Na2 Na 0.47711(19) -0.0458(4) -0.732(9) Uiso 0.0089(14) 0.91(3)

#=======================================================================
data_synthetic_burbankite_P_6.06_GPa_and_ambient_T
#=======================================================================


# Chemical data 
_chemical_formula_sum                    'Na3 Ca2 La C5 O15'
_chemical_formula_weight                 588.075
_chemical_formula_analytical		 'Na2.41(14) Ca2.39(5) La0.94(3) C5 O15'
_chemical_name_mineral                   burbankite
_chemical_compound_source                'synthesised at 5 GPa and 1073 K'

# Unit cell
_cell_formula_units_Z                    1
_cell_length_a                           10.2020(2)
_cell_length_b                           10.2020(2)
_cell_length_c                           6.109(1)
_cell_angle_alpha                        90
_cell_angle_beta                         90
_cell_angle_gamma                        120
_cell_volume                             550.6(1)
_cell_measurement_temperature            298(2)
_cell_measurement_pressure               6060000(50000)

# Experimental details 
_diffrn_ambient_temperature              298(2)
_diffrn_ambient_pressure                 6060000(50000)
_diffrn_radiation_probe                  X-ray
_diffrn_radiation_type                   synchrotron
_diffrn_radiation_wavelength             0.49450
_diffrn_measurement_device_type          'Xpress beamline, Elettra'

# Symmetry information
_symmetry_cell_setting                   hexagonal
_symmetry_space_group_name_H-M           'P 63 m c'
loop_
 _space_group_symop_operation_xyz
   x,y,z
   -y,x-y,z
   -x+y,-x,z
   -x,-y,z+1/2
   y,-x+y,z+1/2
   x-y,x,z+1/2
   -y,-x,z
   -x+y,y,z
   x,x-y,z
   y,x,z+1/2
   x-y,-y,z+1/2
   -x,-x+y,z+1/2

# Structural data
loop_
 _atom_site_label
 _atom_site_type_symbol
 _atom_site_fract_x
 _atom_site_fract_y
 _atom_site_fract_z
 _atom_site_adp_type
 _atom_site_U_iso_or_equiv
 _atom_site_occupancy
  La1 La 0.32011(11) 0.16006(5) 0.085(15) Uiso 0.0085(4) 0.279(11)
  O1 O 0.4560(8) 0.2280(4) -0.268(16) Uiso 0.0164(18) 1
  O2 O 0.3697(6) 0.0751(6) -0.553(15) Uiso 0.0149(13) 1
  O3 O 0.5940(3) 0.1880(7) 0.104(16) Uiso 0.0106(15) 1
  O4 O 0.1456(7) 0.0728(3) -0.255(16) Uiso 0.0138(17) 1
  C1 C 0.4034(10) 0.2017(5) -0.457(16) Uiso 0.009(2) 1
  C2 C 0.666667 0.333333 0.118(18) Uiso 0.012(4) 1
  C3 C 0 0 -0.251(16) Uiso 0.008(3) 1
  Ca1 Ca 0.32011(11) 0.16006(5) 0.085(15) Uiso 0.0085(4) 0.721(11)
  Ca2 Ca 0.47719(18) -0.0456(4) -0.734(15) Uiso 0.0146(13) 0.21(3)
  Na2 Na 0.47719(18) -0.0456(4) -0.734(15) Uiso 0.0146(13) 0.79(3)

#=======================================================================
data_synthetic_burbankite_P_6.65_GPa_and_ambient_T
#=======================================================================


# Chemical data 
_chemical_formula_sum                    'Na3 Ca2 La C5 O15'
_chemical_formula_weight                 588.075
_chemical_formula_analytical		 'Na2.41(14) Ca2.39(5) La0.94(3) C5 O15'
_chemical_name_mineral                   burbankite
_chemical_compound_source                'synthesised at 5 GPa and 1073 K'

# Unit cell
_cell_formula_units_Z                    1
_cell_length_a                           10.1737(2)
_cell_length_b                           10.1737(2)
_cell_length_c                           6.095(1)
_cell_angle_alpha                        90
_cell_angle_beta                         90
_cell_angle_gamma                        120
_cell_volume                             546.3(1)
_cell_measurement_temperature            298(2)
_cell_measurement_pressure               6650000(50000)

# Experimental details 
_diffrn_ambient_temperature              298(2)
_diffrn_ambient_pressure                 6650000(50000)
_diffrn_radiation_probe                  X-ray
_diffrn_radiation_type                   synchrotron
_diffrn_radiation_wavelength             0.49450
_diffrn_measurement_device_type          'Xpress beamline, Elettra'

# Symmetry information
_symmetry_cell_setting                   hexagonal
_symmetry_space_group_name_H-M           'P 63 m c'
loop_
 _space_group_symop_operation_xyz
   x,y,z
   -y,x-y,z
   -x+y,-x,z
   -x,-y,z+1/2
   y,-x+y,z+1/2
   x-y,x,z+1/2
   -y,-x,z
   -x+y,y,z
   x,x-y,z
   y,x,z+1/2
   x-y,-y,z+1/2
   -x,-x+y,z+1/2

# Structural data
loop_
 _atom_site_label
 _atom_site_type_symbol
 _atom_site_fract_x
 _atom_site_fract_y
 _atom_site_fract_z
 _atom_site_adp_type
 _atom_site_U_iso_or_equiv
 _atom_site_occupancy
  La1 La 0.32004(5) 0.16002(3) 0.085(4) Uiso 0.00650(19) 0.264(5)
  O1 O 0.4550(4) 0.22749(19) -0.263(5) Uiso 0.0108(8) 1
  O2 O 0.3713(3) 0.0769(3) -0.551(5) Uiso 0.0099(6) 1
  O3 O 0.59404(18) 0.1881(4) 0.109(5) Uiso 0.0132(8) 1
  O4 O 0.1453(4) 0.07265(18) -0.253(5) Uiso 0.0133(9) 1
  C1 C 0.3993(4) 0.1996(2) -0.452(5) Uiso 0.0050(8) 1
  C2 C 0.666667 0.333333 0.106(7) Uiso 0.0112(16) 1
  C3 C 0 0 -0.252(5) Uiso 0.0097(16) 1
  Ca1 Ca 0.32004(5) 0.16002(3) 0.085(4) Uiso 0.00650(19) 0.736(5)
  Ca2 Ca 0.47691(9) -0.04618(19) -0.735(5) Uiso 0.0087(7) 0.085(16)
  Na2 Na 0.47691(9) -0.04618(19) -0.735(5) Uiso 0.0087(7) 0.915(16)

#=======================================================================
data_synthetic_burbankite_P_7.07_GPa_and_ambient_T
#=======================================================================


# Chemical data 
_chemical_formula_sum                    'Na3 Ca2 La C5 O15'
_chemical_formula_weight                 588.075
_chemical_formula_analytical		 'Na2.41(14) Ca2.39(5) La0.94(3) C5 O15'
_chemical_name_mineral                   burbankite
_chemical_compound_source                'synthesised at 5 GPa and 1073 K'

# Unit cell
_cell_formula_units_Z                    1
_cell_length_a                           10.1772(2)
_cell_length_b                           10.1772(2)
_cell_length_c                           6.079(1)
_cell_angle_alpha                        90
_cell_angle_beta                         90
_cell_angle_gamma                        120
_cell_volume                             545.3(1)
_cell_measurement_temperature            298(2)
_cell_measurement_pressure               7070000(50000)

# Experimental details 
_diffrn_ambient_temperature              298(2)
_diffrn_ambient_pressure                 7070000(50000)
_diffrn_radiation_probe                  X-ray
_diffrn_radiation_type                   synchrotron
_diffrn_radiation_wavelength             0.49450
_diffrn_measurement_device_type          'Xpress beamline, Elettra'

# Symmetry information
_symmetry_cell_setting                   hexagonal
_symmetry_space_group_name_H-M           'P 63 m c'
loop_
 _space_group_symop_operation_xyz
   x,y,z
   -y,x-y,z
   -x+y,-x,z
   -x,-y,z+1/2
   y,-x+y,z+1/2
   x-y,x,z+1/2
   -y,-x,z
   -x+y,y,z
   x,x-y,z
   y,x,z+1/2
   x-y,-y,z+1/2
   -x,-x+y,z+1/2

# Structural data
loop_
 _atom_site_label
 _atom_site_type_symbol
 _atom_site_fract_x
 _atom_site_fract_y
 _atom_site_fract_z
 _atom_site_adp_type
 _atom_site_U_iso_or_equiv
 _atom_site_occupancy
  La1 La 0.32009(6) 0.16004(3) 0.084(6) Uiso 0.0071(2) 0.279(6)
  O1 O 0.4566(5) 0.2283(2) -0.261(6) Uiso 0.0101(9) 1
  O2 O 0.3715(3) 0.0766(3) -0.552(6) Uiso 0.0106(7) 1
  O3 O 0.5939(2) 0.1877(4) 0.107(6) Uiso 0.0105(9) 1
  O4 O 0.1445(4) 0.0723(2) -0.254(6) Uiso 0.0135(10) 1
  C1 C 0.4010(6) 0.2005(3) -0.451(7) Uiso 0.0066(11) 1
  C2 C 0.666667 0.333333 0.106(8) Uiso 0.0091(19) 1
  C3 C 0 0 -0.246(7) Uiso 0.0068(18) 1
  Ca1 Ca 0.32009(6) 0.16004(3) 0.084(6) Uiso 0.0071(2) 0.721(6)
  Ca2 Ca 0.47695(11) -0.0461(2) -0.734(6) Uiso 0.0104(8) 0.137(17)
  Na2 Na 0.47695(11) -0.0461(2) -0.734(6) Uiso 0.0104(8) 0.863(17)

#=======================================================================
data_synthetic_burbankite_ambient_P_and_T_at_synchrotron_HT_ramp
#=======================================================================


# Chemical data 
_chemical_formula_sum                    'Na3 Ca2 La C5 O15'
_chemical_formula_weight                 588.075
_chemical_formula_analytical		 'Na2.41(14) Ca2.39(5) La0.94(3) C5 O15'
_chemical_name_mineral                   burbankite
_chemical_compound_source                'synthesised at 5 GPa and 1073 K'

# Unit cell
_cell_formula_units_Z                    1
_cell_length_a                           10.4233(2)
_cell_length_b                           10.4233(2)
_cell_length_c                           6.2905(1)
_cell_angle_alpha                        90
_cell_angle_beta                         90
_cell_angle_gamma                        120
_cell_volume                             591.86(2)
_cell_measurement_temperature            298(2)
_cell_measurement_pressure               1000(100)

# Experimental details 
_diffrn_ambient_temperature              298(2)
_diffrn_ambient_pressure                 1000(100)
_diffrn_radiation_probe                  X-ray
_diffrn_radiation_type                   synchrotron
_diffrn_radiation_wavelength             0.7000 
_diffrn_measurement_device_type          'XRD1 beamline, Elettra'

# Symmetry information
_symmetry_cell_setting                   hexagonal
_symmetry_space_group_name_H-M           'P 63 m c'
loop_
 _space_group_symop_operation_xyz
   x,y,z
   -y,x-y,z
   -x+y,-x,z
   -x,-y,z+1/2
   y,-x+y,z+1/2
   x-y,x,z+1/2
   -y,-x,z
   -x+y,y,z
   x,x-y,z
   y,x,z+1/2
   x-y,-y,z+1/2
   -x,-x+y,z+1/2

# Structural data
loop_
 _atom_site_label
 _atom_site_type_symbol
 _atom_site_fract_x
 _atom_site_fract_y
 _atom_site_fract_z
 _atom_site_adp_type
 _atom_site_U_iso_or_equiv
 _atom_site_occupancy
  Ca1 Ca 0.841706(12) 0.68341(2) 0.691(14) Uani 0.01268(8) 0.768(2)
  La1 La 0.841706(12) 0.68341(2) 0.691(14) Uani 0.01268(8) 0.232(2)
  Na2 Na 0.52329(5) 0.04658(9) 0.379(14) Uani 0.0160(3) 0.915(8)
  Ca2 Ca 0.52329(5) 0.04658(9) 0.379(14) Uani 0.0160(3) 0.085(8)
  O1 O 0.80873(18) 0.40436(9) 0.711(14) Uani 0.0232(5) 1
  O2 O 0.77644(8) 0.55288(17) 0.342(14) Uani 0.0172(5) 1
  O3 O 0.63158(13) 0.70903(13) 0.558(14) Uani 0.0186(4) 1
  C1 C 0.666667 0.333333 0.713(14) Uani 0.0131(9) 1
  O4 O 0.14082(18) 0.07041(9) 0.355(14) Uani 0.0299(6) 1
  C2 C 0 0 0.357(14) Uani 0.0125(7) 1
  C3 C 0.3953(2) 0.19763(11) 0.155(14) Uani 0.0123(6) 1

#=======================================================================
data_synthetic_burbankite_ambient_P_and_T_332K
#=======================================================================


# Chemical data 
_chemical_formula_sum                    'Na3 Ca2 La C5 O15'
_chemical_formula_weight                 588.075
_chemical_formula_analytical		 'Na2.41(14) Ca2.39(5) La0.94(3) C5 O15'
_chemical_name_mineral                   burbankite
_chemical_compound_source                'synthesised at 5 GPa and 1073 K'

# Unit cell
_cell_formula_units_Z                    1
_cell_length_a                           10.4296(2)
_cell_length_b                           10.4233(2)
_cell_length_c                           6.2969(1)
_cell_angle_alpha                        90
_cell_angle_beta                         90
_cell_angle_gamma                        120
_cell_volume                             593.18(2)
_cell_measurement_temperature            332(1)
_cell_measurement_pressure               1000(100)

# Experimental details 
_diffrn_ambient_temperature              332(1)
_diffrn_ambient_pressure                 1000(100)
_diffrn_radiation_probe                  X-ray
_diffrn_radiation_type                   synchrotron
_diffrn_radiation_wavelength             0.7000 
_diffrn_measurement_device_type          'XRD1 beamline, Elettra'

# Symmetry information
_symmetry_cell_setting                   hexagonal
_symmetry_space_group_name_H-M           'P 63 m c'
loop_
 _space_group_symop_operation_xyz
   x,y,z
   -y,x-y,z
   -x+y,-x,z
   -x,-y,z+1/2
   y,-x+y,z+1/2
   x-y,x,z+1/2
   -y,-x,z
   -x+y,y,z
   x,x-y,z
   y,x,z+1/2
   x-y,-y,z+1/2
   -x,-x+y,z+1/2

# Structural data
loop_
 _atom_site_label
 _atom_site_type_symbol
 _atom_site_fract_x
 _atom_site_fract_y
 _atom_site_fract_z
 _atom_site_adp_type
 _atom_site_U_iso_or_equiv
 _atom_site_occupancy
  Ca1 Ca 0.841758(11) 0.68352(2) 0.691(12) Uani 0.01266(7) 0.768(2)
  La1 La 0.841758(11) 0.68352(2) 0.691(12) Uani 0.01266(7) 0.232(2)
  Na2 Na 0.52320(4) 0.04641(9) 0.379(12) Uani 0.0168(3) 0.910(7)
  Ca2 Ca 0.52320(4) 0.04641(9) 0.379(12) Uani 0.0168(3) 0.090(7)
  O1 O 0.80873(17) 0.40437(9) 0.711(12) Uani 0.0240(5) 1
  O2 O 0.77656(8) 0.55313(16) 0.342(12) Uani 0.0178(5) 1
  O3 O 0.63164(13) 0.70922(13) 0.558(12) Uani 0.0190(4) 1
  C1 C 0.666667 0.333333 0.712(12) Uani 0.0141(8) 1
  O4 O 0.14081(17) 0.07040(9) 0.355(12) Uani 0.0303(6) 1
  C2 C 0 0 0.358(12) Uani 0.0122(7) 1
  C3 C 0.3947(2) 0.19736(10) 0.155(12) Uani 0.0125(6) 1

#=======================================================================
data_synthetic_burbankite_ambient_P_and_T_362K
#=======================================================================


# Chemical data 
_chemical_formula_sum                    'Na3 Ca2 La C5 O15'
_chemical_formula_weight                 588.075
_chemical_formula_analytical		 'Na2.41(14) Ca2.39(5) La0.94(3) C5 O15'
_chemical_name_mineral                   burbankite
_chemical_compound_source                'synthesised at 5 GPa and 1073 K'

# Unit cell
_cell_formula_units_Z                    1
_cell_length_a                           10.4353(2)
_cell_length_b                           10.4353(2)
_cell_length_c                           6.3022(1)
_cell_angle_alpha                        90
_cell_angle_beta                         90
_cell_angle_gamma                        120
_cell_volume                             594.34(2)
_cell_measurement_temperature            362(1)
_cell_measurement_pressure               1000(100)

# Experimental details 
_diffrn_ambient_temperature              362(1)
_diffrn_ambient_pressure                 1000(100)
_diffrn_radiation_probe                  X-ray
_diffrn_radiation_type                   synchrotron
_diffrn_radiation_wavelength             0.7000 
_diffrn_measurement_device_type          'XRD1 beamline, Elettra'

# Symmetry information
_symmetry_cell_setting                   hexagonal
_symmetry_space_group_name_H-M           'P 63 m c'
loop_
 _space_group_symop_operation_xyz
   x,y,z
   -y,x-y,z
   -x+y,-x,z
   -x,-y,z+1/2
   y,-x+y,z+1/2
   x-y,x,z+1/2
   -y,-x,z
   -x+y,y,z
   x,x-y,z
   y,x,z+1/2
   x-y,-y,z+1/2
   -x,-x+y,z+1/2

# Structural data
loop_
 _atom_site_label
 _atom_site_type_symbol
 _atom_site_fract_x
 _atom_site_fract_y
 _atom_site_fract_z
 _atom_site_adp_type
 _atom_site_U_iso_or_equiv
 _atom_site_occupancy
  Ca1 Ca 0.84180(2) 0.68360(5) 0.69(3) Uani 0.01349(16) 0.774(4)
  La1 La 0.84180(2) 0.68360(5) 0.69(3) Uani 0.01349(16) 0.226(4)
  Na2 Na 0.52317(9) 0.04635(19) 0.38(3) Uani 0.0182(7) 0.910(16)
  Ca2 Ca 0.52317(9) 0.04635(19) 0.38(3) Uani 0.0182(7) 0.090(16)
  O1 O 0.8091(4) 0.40455(18) 0.71(3) Uani 0.0260(10) 1
  O2 O 0.77666(18) 0.5533(4) 0.34(3) Uani 0.0195(10) 1
  O3 O 0.6316(3) 0.7093(3) 0.56(3) Uani 0.0206(9) 1
  C1 C 0.666667 0.333333 0.71(3) Uani 0.0165(18) 1
  O4 O 0.1405(4) 0.07025(18) 0.35(3) Uani 0.0324(13) 1
  C2 C 0 0 0.36(3) Uani 0.0137(14) 1
  C3 C 0.3947(4) 0.1973(2) 0.16(3) Uani 0.0138(12) 1

#=======================================================================
data_synthetic_burbankite_ambient_P_and_T_391K
#=======================================================================


# Chemical data 
_chemical_formula_sum                    'Na3 Ca2 La C5 O15'
_chemical_formula_weight                 588.075
_chemical_formula_analytical		 'Na2.41(14) Ca2.39(5) La0.94(3) C5 O15'
_chemical_name_mineral                   burbankite
_chemical_compound_source                'synthesised at 5 GPa and 1073 K'

# Unit cell
_cell_formula_units_Z                    1
_cell_length_a                           10.4404(2)
_cell_length_b                           10.4404(2)
_cell_length_c                           6.3077(1)
_cell_angle_alpha                        90
_cell_angle_beta                         90
_cell_angle_gamma                        120
_cell_volume                             595.44(2)
_cell_measurement_temperature            391(1)
_cell_measurement_pressure               1000(100)

# Experimental details 
_diffrn_ambient_temperature              391(1)
_diffrn_ambient_pressure                 1000(100)
_diffrn_radiation_probe                  X-ray
_diffrn_radiation_type                   synchrotron
_diffrn_radiation_wavelength             0.7000 
_diffrn_measurement_device_type          'XRD1 beamline, Elettra'

# Symmetry information
_symmetry_cell_setting                   hexagonal
_symmetry_space_group_name_H-M           'P 63 m c'
loop_
 _space_group_symop_operation_xyz
   x,y,z
   -y,x-y,z
   -x+y,-x,z
   -x,-y,z+1/2
   y,-x+y,z+1/2
   x-y,x,z+1/2
   -y,-x,z
   -x+y,y,z
   x,x-y,z
   y,x,z+1/2
   x-y,-y,z+1/2
   -x,-x+y,z+1/2

# Structural data
loop_
 _atom_site_label
 _atom_site_type_symbol
 _atom_site_fract_x
 _atom_site_fract_y
 _atom_site_fract_z
 _atom_site_adp_type
 _atom_site_U_iso_or_equiv
 _atom_site_occupancy
  Ca1 Ca 0.84184(3) 0.68368(6) 0.69(5) Uani 0.0222(2) 0.781(4)
  La1 La 0.84184(3) 0.68368(6) 0.69(5) Uani 0.0222(2) 0.219(4)
  Na2 Na 0.52302(12) 0.0460(2) 0.38(5) Uani 0.0294(9) 0.886(12)
  Ca2 Ca 0.52302(12) 0.0460(2) 0.38(5) Uani 0.0294(9) 0.114(12)
  O1 O 0.8088(4) 0.4044(2) 0.71(5) Uani 0.0380(16) 1
  O2 O 0.7766(2) 0.5531(5) 0.34(5) Uani 0.0291(15) 1
  O3 O 0.6332(3) 0.7102(3) 0.56(5) Uani 0.0310(12) 1
  C1 C 0.666667 0.333333 0.72(5) Uani 0.025(3) 1
  O4 O 0.1405(4) 0.0703(2) 0.36(5) Uani 0.0436(18) 1
  C2 C 0 0 0.36(5) Uani 0.032(3) 1
  C3 C 0.3940(6) 0.1970(3) 0.16(5) Uani 0.027(2) 1

#=======================================================================
data_synthetic_burbankite_ambient_P_and_T_421K
#=======================================================================


# Chemical data 
_chemical_formula_sum                    'Na3 Ca2 La C5 O15'
_chemical_formula_weight                 588.075
_chemical_formula_analytical		 'Na2.41(14) Ca2.39(5) La0.94(3) C5 O15'
_chemical_name_mineral                   burbankite
_chemical_compound_source                'synthesised at 5 GPa and 1073 K'

# Unit cell
_cell_formula_units_Z                    1
_cell_length_a                           10.4461(2)
_cell_length_b                           10.4461(2)
_cell_length_c                           6.3136(2)
_cell_angle_alpha                        90
_cell_angle_beta                         90
_cell_angle_gamma                        120
_cell_volume                             596.65(2)
_cell_measurement_temperature            421(1)
_cell_measurement_pressure               1000(100)

# Experimental details 
_diffrn_ambient_temperature              421(1)
_diffrn_ambient_pressure                 1000(100)
_diffrn_radiation_probe                  X-ray
_diffrn_radiation_type                   synchrotron
_diffrn_radiation_wavelength             0.7000 
_diffrn_measurement_device_type          'XRD1 beamline, Elettra'

# Symmetry information
_symmetry_cell_setting                   hexagonal
_symmetry_space_group_name_H-M           'P 63 m c'
loop_
 _space_group_symop_operation_xyz
   x,y,z
   -y,x-y,z
   -x+y,-x,z
   -x,-y,z+1/2
   y,-x+y,z+1/2
   x-y,x,z+1/2
   -y,-x,z
   -x+y,y,z
   x,x-y,z
   y,x,z+1/2
   x-y,-y,z+1/2
   -x,-x+y,z+1/2

# Structural data
loop_
 _atom_site_label
 _atom_site_type_symbol
 _atom_site_fract_x
 _atom_site_fract_y
 _atom_site_fract_z
 _atom_site_adp_type
 _atom_site_U_iso_or_equiv
 _atom_site_occupancy
  Ca1 Ca 0.84190(4) 0.68381(8) 0.69(4) Uani 0.0166(3) 0.774(6)
  La1 La 0.84190(4) 0.68381(8) 0.69(4) Uani 0.0166(3) 0.226(6)
  Na2 Na 0.52308(16) 0.0462(3) 0.38(4) Uani 0.0229(12) 0.896(18)
  Ca2 Ca 0.52308(16) 0.0462(3) 0.38(4) Uani 0.0229(12) 0.104(18)
  O1 O 0.8084(6) 0.4042(3) 0.71(4) Uani 0.031(2) 1
  O2 O 0.7767(3) 0.5535(6) 0.34(4) Uani 0.024(2) 1
  O3 O 0.6321(5) 0.7098(5) 0.56(4) Uani 0.0246(16) 1
  C1 C 0.666667 0.333333 0.71(4) Uani 0.016(3) 1
  O4 O 0.1399(6) 0.0700(3) 0.36(4) Uani 0.038(3) 1
  C2 C 0 0 0.36(4) Uani 0.016(3) 1
  C3 C 0.3953(8) 0.1977(4) 0.16(4) Uani 0.016(2) 1

#=======================================================================
data_synthetic_burbankite_ambient_P_and_T_450K
#=======================================================================


# Chemical data 
_chemical_formula_sum                    'Na3 Ca2 La C5 O15'
_chemical_formula_weight                 588.075
_chemical_formula_analytical		 'Na2.41(14) Ca2.39(5) La0.94(3) C5 O15'
_chemical_name_mineral                   burbankite
_chemical_compound_source                'synthesised at 5 GPa and 1073 K'

# Unit cell
_cell_formula_units_Z                    1
_cell_length_a                           10.4521(2)
_cell_length_b                           10.4521(2)
_cell_length_c                           6.3194(1)
_cell_angle_alpha                        90
_cell_angle_beta                         90
_cell_angle_gamma                        120
_cell_volume                             597.87(2)
_cell_measurement_temperature            450(1)
_cell_measurement_pressure               1000(100)

# Experimental details 
_diffrn_ambient_temperature              450(1)
_diffrn_ambient_pressure                 1000(100)
_diffrn_radiation_probe                  X-ray
_diffrn_radiation_type                   synchrotron
_diffrn_radiation_wavelength             0.7000 
_diffrn_measurement_device_type          'XRD1 beamline, Elettra'

# Symmetry information
_symmetry_cell_setting                   hexagonal
_symmetry_space_group_name_H-M           'P 63 m c'
loop_
 _space_group_symop_operation_xyz
   x,y,z
   -y,x-y,z
   -x+y,-x,z
   -x,-y,z+1/2
   y,-x+y,z+1/2
   x-y,x,z+1/2
   -y,-x,z
   -x+y,y,z
   x,x-y,z
   y,x,z+1/2
   x-y,-y,z+1/2
   -x,-x+y,z+1/2

# Structural data
loop_
 _atom_site_label
 _atom_site_type_symbol
 _atom_site_fract_x
 _atom_site_fract_y
 _atom_site_fract_z
 _atom_site_adp_type
 _atom_site_U_iso_or_equiv
 _atom_site_occupancy
  Ca1 Ca 0.841964(12) 0.68393(2) 0.691(9) Uani 0.01579(8) 0.773(2)
  La1 La 0.841964(12) 0.68393(2) 0.691(9) Uani 0.01579(8) 0.227(2)
  Na2 Na 0.52316(5) 0.04632(9) 0.380(9) Uani 0.0211(4) 0.922(8)
  Ca2 Ca 0.52316(5) 0.04632(9) 0.380(9) Uani 0.0211(4) 0.078(8)
  O1 O 0.80832(19) 0.40416(9) 0.711(9) Uani 0.0305(5) 1
  O2 O 0.77695(9) 0.55390(18) 0.342(9) Uani 0.0231(5) 1
  O3 O 0.63162(13) 0.70953(14) 0.558(9) Uani 0.0239(4) 1
  C1 C 0.666667 0.333333 0.712(9) Uani 0.0169(9) 1
  O4 O 0.13997(19) 0.06998(9) 0.356(9) Uani 0.0376(7) 1
  C2 C 0 0 0.358(9) Uani 0.0169(7) 1
  C3 C 0.3942(2) 0.19708(11) 0.155(9) Uani 0.0148(6) 1

#=======================================================================
data_synthetic_burbankite_ambient_P_and_T_480K
#=======================================================================


# Chemical data 
_chemical_formula_sum                    'Na3 Ca2 La C5 O15'
_chemical_formula_weight                 588.075
_chemical_formula_analytical		 'Na2.41(14) Ca2.39(5) La0.94(3) C5 O15'
_chemical_name_mineral                   burbankite
_chemical_compound_source                'synthesised at 5 GPa and 1073 K'

# Unit cell
_cell_formula_units_Z                    1
_cell_length_a                           10.4581(2)
_cell_length_b                           10.4581(2)
_cell_length_c                           6.3252(1)
_cell_angle_alpha                        90
_cell_angle_beta                         90
_cell_angle_gamma                        120
_cell_volume                             599.11(2)
_cell_measurement_temperature            480(1)
_cell_measurement_pressure               1000(100)

# Experimental details 
_diffrn_ambient_temperature              480(1)
_diffrn_ambient_pressure                 1000(100)
_diffrn_radiation_probe                  X-ray
_diffrn_radiation_type                   synchrotron
_diffrn_radiation_wavelength             0.7000 
_diffrn_measurement_device_type          'XRD1 beamline, Elettra'

# Symmetry information
_symmetry_cell_setting                   hexagonal
_symmetry_space_group_name_H-M           'P 63 m c'
loop_
 _space_group_symop_operation_xyz
   x,y,z
   -y,x-y,z
   -x+y,-x,z
   -x,-y,z+1/2
   y,-x+y,z+1/2
   x-y,x,z+1/2
   -y,-x,z
   -x+y,y,z
   x,x-y,z
   y,x,z+1/2
   x-y,-y,z+1/2
   -x,-x+y,z+1/2

# Structural data
loop_
 _atom_site_label
 _atom_site_type_symbol
 _atom_site_fract_x
 _atom_site_fract_y
 _atom_site_fract_z
 _atom_site_adp_type
 _atom_site_U_iso_or_equiv
 _atom_site_occupancy
  Ca1 Ca 0.842001(12) 0.68400(2) 0.691(9) Uani 0.01801(8) 0.767(2)
  La1 La 0.842001(12) 0.68400(2) 0.691(9) Uani 0.01801(8) 0.233(2)
  Na2 Na 0.52311(5) 0.04621(10) 0.380(9) Uani 0.0238(4) 0.908(8)
  Ca2 Ca 0.52311(5) 0.04621(10) 0.380(9) Uani 0.0238(4) 0.092(8)
  O1 O 0.80808(19) 0.40404(9) 0.711(9) Uani 0.0321(6) 1
  O2 O 0.77703(9) 0.55406(18) 0.341(9) Uani 0.0253(5) 1
  O3 O 0.63156(14) 0.70947(14) 0.559(9) Uani 0.0260(5) 1
  C1 C 0.666667 0.333333 0.713(9) Uani 0.0181(9) 1
  O4 O 0.13991(19) 0.06996(9) 0.356(9) Uani 0.0400(7) 1
  C2 C 0 0 0.358(9) Uani 0.0177(7) 1
  C3 C 0.3945(2) 0.19724(11) 0.155(9) Uani 0.0161(6) 1 

#=======================================================================
data_synthetic_burbankite_ambient_P_and_T_509K
#=======================================================================


# Chemical data 
_chemical_formula_sum                    'Na3 Ca2 La C5 O15'
_chemical_formula_weight                 588.075
_chemical_formula_analytical		 'Na2.41(14) Ca2.39(5) La0.94(3) C5 O15'
_chemical_name_mineral                   burbankite
_chemical_compound_source                'synthesised at 5 GPa and 1073 K'

# Unit cell
_cell_formula_units_Z                    1
_cell_length_a                           10.4637(2)
_cell_length_b                           10.4637(2)
_cell_length_c                           6.3313(1)
_cell_angle_alpha                        90
_cell_angle_beta                         90
_cell_angle_gamma                        120
_cell_volume                             600.34(2)
_cell_measurement_temperature            509(1)
_cell_measurement_pressure               1000(100)

# Experimental details 
_diffrn_ambient_temperature              509(1)
_diffrn_ambient_pressure                 1000(100)
_diffrn_radiation_probe                  X-ray
_diffrn_radiation_type                   synchrotron
_diffrn_radiation_wavelength             0.7000 
_diffrn_measurement_device_type          'XRD1 beamline, Elettra'

# Symmetry information
_symmetry_cell_setting                   hexagonal
_symmetry_space_group_name_H-M           'P 63 m c'
loop_
 _space_group_symop_operation_xyz
   x,y,z
   -y,x-y,z
   -x+y,-x,z
   -x,-y,z+1/2
   y,-x+y,z+1/2
   x-y,x,z+1/2
   -y,-x,z
   -x+y,y,z
   x,x-y,z
   y,x,z+1/2
   x-y,-y,z+1/2
   -x,-x+y,z+1/2

# Structural data
loop_
 _atom_site_label
 _atom_site_type_symbol
 _atom_site_fract_x
 _atom_site_fract_y
 _atom_site_fract_z
 _atom_site_adp_type
 _atom_site_U_iso_or_equiv
 _atom_site_occupancy
  Ca1 Ca 0.84206(2) 0.68412(5) 0.69(2) Uani 0.01887(15) 0.774(4)
  La1 La 0.84206(2) 0.68412(5) 0.69(2) Uani 0.01887(15) 0.226(4)
  Na2 Na 0.52310(9) 0.04619(19) 0.38(2) Uani 0.0252(7) 0.913(15)
  Ca2 Ca 0.52310(9) 0.04619(19) 0.38(2) Uani 0.0252(7) 0.087(15)
  O1 O 0.8080(4) 0.40400(18) 0.71(2) Uani 0.0343(11) 1
  O2 O 0.77716(18) 0.5543(4) 0.34(2) Uani 0.0272(11) 1
  O3 O 0.6318(3) 0.7098(3) 0.56(2) Uani 0.0281(9) 1
  C1 C 0.666667 0.333333 0.71(2) Uani 0.0200(18) 1
  O4 O 0.1394(4) 0.06972(18) 0.36(2) Uani 0.0423(14) 1
  C2 C 0 0 0.36(2) Uani 0.0197(14) 1
  C3 C 0.3943(4) 0.1971(2) 0.16(2) Uani 0.0180(12) 1

#=======================================================================
data_synthetic_burbankite_ambient_P_and_T_539K
#=======================================================================


# Chemical data 
_chemical_formula_sum                    'Na3 Ca2 La C5 O15'
_chemical_formula_weight                 588.075
_chemical_formula_analytical		 'Na2.41(14) Ca2.39(5) La0.94(3) C5 O15'
_chemical_name_mineral                   burbankite
_chemical_compound_source                'synthesised at 5 GPa and 1073 K'

# Unit cell
_cell_formula_units_Z                    1
_cell_length_a                           10.4695(2)
_cell_length_b                           10.4695(2)
_cell_length_c                           6.3371(1)
_cell_angle_alpha                        90
_cell_angle_beta                         90
_cell_angle_gamma                        120
_cell_volume                             601.55(2)
_cell_measurement_temperature            539(1)
_cell_measurement_pressure               1000(100)

# Experimental details 
_diffrn_ambient_temperature              539(1)
_diffrn_ambient_pressure                 1000(100)
_diffrn_radiation_probe                  X-ray
_diffrn_radiation_type                   synchrotron
_diffrn_radiation_wavelength             0.7000 
_diffrn_measurement_device_type          'XRD1 beamline, Elettra'

# Symmetry information
_symmetry_cell_setting                   hexagonal
_symmetry_space_group_name_H-M           'P 63 m c'
loop_
 _space_group_symop_operation_xyz
   x,y,z
   -y,x-y,z
   -x+y,-x,z
   -x,-y,z+1/2
   y,-x+y,z+1/2
   x-y,x,z+1/2
   -y,-x,z
   -x+y,y,z
   x,x-y,z
   y,x,z+1/2
   x-y,-y,z+1/2
   -x,-x+y,z+1/2

# Structural data
loop_
 _atom_site_label
 _atom_site_type_symbol
 _atom_site_fract_x
 _atom_site_fract_y
 _atom_site_fract_z
 _atom_site_adp_type
 _atom_site_U_iso_or_equiv
 _atom_site_occupancy
  Ca1 Ca 0.84211(2) 0.68421(5) 0.69(3) Uani 0.01977(16) 0.777(4)
  La1 La 0.84211(2) 0.68421(5) 0.69(3) Uani 0.01977(16) 0.223(4)
  Na2 Na 0.52305(10) 0.04609(19) 0.38(3) Uani 0.0265(7) 0.920(15)
  Ca2 Ca 0.52305(10) 0.04609(19) 0.38(3) Uani 0.0265(7) 0.080(15)
  O1 O 0.8079(4) 0.40394(19) 0.71(3) Uani 0.0365(12) 1
  O2 O 0.77716(18) 0.5543(4) 0.34(3) Uani 0.0289(11) 1
  O3 O 0.6320(3) 0.7100(3) 0.56(3) Uani 0.0293(9) 1
  C1 C 0.666667 0.333333 0.71(3) Uani 0.0224(19) 1
  O4 O 0.1398(4) 0.06989(19) 0.36(3) Uani 0.0443(14) 1
  C2 C 0 0 0.36(3) Uani 0.0191(14) 1
  C3 C 0.3942(4) 0.1971(2) 0.16(3) Uani 0.0185(12) 1 

#=======================================================================
data_synthetic_burbankite_ambient_P_and_T_568K
#=======================================================================


# Chemical data 
_chemical_formula_sum                    'Na3 Ca2 La C5 O15'
_chemical_formula_weight                 588.075
_chemical_formula_analytical		 'Na2.41(14) Ca2.39(5) La0.94(3) C5 O15'
_chemical_name_mineral                   burbankite
_chemical_compound_source                'synthesised at 5 GPa and 1073 K'

# Unit cell
_cell_formula_units_Z                    1
_cell_length_a                           10.4753(2)
_cell_length_b                           10.4753(2)
_cell_length_c                           6.3427(1)
_cell_angle_alpha                        90
_cell_angle_beta                         90
_cell_angle_gamma                        120
_cell_volume                             602.75(2)
_cell_measurement_temperature            568(1)
_cell_measurement_pressure               1000(100)

# Experimental details 
_diffrn_ambient_temperature              568(1)
_diffrn_ambient_pressure                 1000(100)
_diffrn_radiation_probe                  X-ray
_diffrn_radiation_type                   synchrotron
_diffrn_radiation_wavelength             0.7000 
_diffrn_measurement_device_type          'XRD1 beamline, Elettra'

# Symmetry information
_symmetry_cell_setting                   hexagonal
_symmetry_space_group_name_H-M           'P 63 m c'
loop_
 _space_group_symop_operation_xyz
   x,y,z
   -y,x-y,z
   -x+y,-x,z
   -x,-y,z+1/2
   y,-x+y,z+1/2
   x-y,x,z+1/2
   -y,-x,z
   -x+y,y,z
   x,x-y,z
   y,x,z+1/2
   x-y,-y,z+1/2
   -x,-x+y,z+1/2

# Structural data
loop_
 _atom_site_label
 _atom_site_type_symbol
 _atom_site_fract_x
 _atom_site_fract_y
 _atom_site_fract_z
 _atom_site_adp_type
 _atom_site_U_iso_or_equiv
 _atom_site_occupancy
  Ca1 Ca 0.842147(13) 0.68429(3) 0.691(14) Uani 0.02048(9) 0.768(3)
  La1 La 0.842147(13) 0.68429(3) 0.691(14) Uani 0.02048(9) 0.232(3)
  Na2 Na 0.52300(5) 0.04601(11) 0.380(14) Uani 0.0269(4) 0.922(9)
  Ca2 Ca 0.52300(5) 0.04601(11) 0.380(14) Uani 0.0269(4) 0.078(9)
  O1 O 0.8077(2) 0.40385(11) 0.711(14) Uani 0.0372(6) 1
  O2 O 0.77746(10) 0.5549(2) 0.341(14) Uani 0.0297(6) 1
  O3 O 0.63197(16) 0.71005(16) 0.559(14) Uani 0.0297(5) 1
  C1 C 0.666667 0.333333 0.713(14) Uani 0.0207(10) 1
  O4 O 0.1396(2) 0.06982(10) 0.356(14) Uani 0.0451(8) 1
  C2 C 0 0 0.359(14) Uani 0.0195(8) 1
  C3 C 0.3946(2) 0.19729(12) 0.155(14) Uani 0.0190(7) 1 

#=======================================================================
data_synthetic_burbankite_ambient_P_and_T_598K
#=======================================================================


# Chemical data 
_chemical_formula_sum                    'Na3 Ca2 La C5 O15'
_chemical_formula_weight                 588.075
_chemical_formula_analytical		 'Na2.41(14) Ca2.39(5) La0.94(3) C5 O15'
_chemical_name_mineral                   burbankite
_chemical_compound_source                'synthesised at 5 GPa and 1073 K'

# Unit cell
_cell_formula_units_Z                    1
_cell_length_a                           10.4839(3)
_cell_length_b                           10.4839(3)
_cell_length_c                           6.3478(2)
_cell_angle_alpha                        90
_cell_angle_beta                         90
_cell_angle_gamma                        120
_cell_volume                             604.23(3)
_cell_measurement_temperature            598(1)
_cell_measurement_pressure               1000(100)

# Experimental details 
_diffrn_ambient_temperature              598(1)
_diffrn_ambient_pressure                 1000(100)
_diffrn_radiation_probe                  X-ray
_diffrn_radiation_type                   synchrotron
_diffrn_radiation_wavelength             0.7000 
_diffrn_measurement_device_type          'XRD1 beamline, Elettra'

# Symmetry information
_symmetry_cell_setting                   hexagonal
_symmetry_space_group_name_H-M           'P 63 m c'
loop_
 _space_group_symop_operation_xyz
   x,y,z
   -y,x-y,z
   -x+y,-x,z
   -x,-y,z+1/2
   y,-x+y,z+1/2
   x-y,x,z+1/2
   -y,-x,z
   -x+y,y,z
   x,x-y,z
   y,x,z+1/2
   x-y,-y,z+1/2
   -x,-x+y,z+1/2

# Structural data
loop_
 _atom_site_label
 _atom_site_type_symbol
 _atom_site_fract_x
 _atom_site_fract_y
 _atom_site_fract_z
 _atom_site_adp_type
 _atom_site_U_iso_or_equiv
 _atom_site_occupancy
  Ca1 Ca 0.84220(5) 0.68440(11) 0.69(6) Uani 0.0254(3) 0.759(6)
  La1 La 0.84220(5) 0.68440(11) 0.69(6) Uani 0.0254(3) 0.241(6)
  Na2 Na 0.5229(2) 0.0459(4) 0.38(6) Uani 0.0359(15) 0.840(19)
  Ca2 Ca 0.5229(2) 0.0459(4) 0.38(6) Uani 0.0359(15) 0.160(19)
  O1 O 0.8081(7) 0.4041(3) 0.71(6) Uani 0.039(2) 1
  O2 O 0.7775(4) 0.5550(8) 0.34(6) Uani 0.033(3) 1
  O3 O 0.6317(5) 0.7090(6) 0.56(6) Uani 0.034(2) 1
  C1 C 0.666667 0.333333 0.72(6) Uani 0.026(4) 1
  O4 O 0.1395(7) 0.0698(4) 0.36(6) Uani 0.051(3) 1
  C2 C 0 0 0.36(6) Uani 0.025(4) 1
  C3 C 0.3929(9) 0.1965(5) 0.15(6) Uani 0.024(3) 1 

#=======================================================================
data_synthetic_burbankite_ambient_P_and_T_628K
#=======================================================================


# Chemical data 
_chemical_formula_sum                    'Na3 Ca2 La C5 O15'
_chemical_formula_weight                 588.075
_chemical_formula_analytical		 'Na2.41(14) Ca2.39(5) La0.94(3) C5 O15'
_chemical_name_mineral                   burbankite
_chemical_compound_source                'synthesised at 5 GPa and 1073 K'

# Unit cell
_cell_formula_units_Z                    1
_cell_length_a                           10.4891(2)
_cell_length_b                           10.4891(2)
_cell_length_c                           6.3539(2)
_cell_angle_alpha                        90
_cell_angle_beta                         90
_cell_angle_gamma                        120
_cell_volume                             605.41(2)
_cell_measurement_temperature            628(1)
_cell_measurement_pressure               1000(100)

# Experimental details 
_diffrn_ambient_temperature              628(1)
_diffrn_ambient_pressure                 1000(100)
_diffrn_radiation_probe                  X-ray
_diffrn_radiation_type                   synchrotron
_diffrn_radiation_wavelength             0.7000 
_diffrn_measurement_device_type          'XRD1 beamline, Elettra'

# Symmetry information
_symmetry_cell_setting                   hexagonal
_symmetry_space_group_name_H-M           'P 63 m c'
loop_
 _space_group_symop_operation_xyz
   x,y,z
   -y,x-y,z
   -x+y,-x,z
   -x,-y,z+1/2
   y,-x+y,z+1/2
   x-y,x,z+1/2
   -y,-x,z
   -x+y,y,z
   x,x-y,z
   y,x,z+1/2
   x-y,-y,z+1/2
   -x,-x+y,z+1/2

# Structural data
loop_
 _atom_site_label
 _atom_site_type_symbol
 _atom_site_fract_x
 _atom_site_fract_y
 _atom_site_fract_z
 _atom_site_adp_type
 _atom_site_U_iso_or_equiv
 _atom_site_occupancy
  Ca1 Ca 0.84228(3) 0.68457(6) 0.69(3) Uani 0.0272(2) 0.767(5)
  La1 La 0.84228(3) 0.68457(6) 0.69(3) Uani 0.0272(2) 0.233(5)
  Na2 Na 0.52301(11) 0.0460(2) 0.38(3) Uani 0.0333(10) 0.939(14)
  Ca2 Ca 0.52301(11) 0.0460(2) 0.38(3) Uani 0.0333(10) 0.061(14)
  O1 O 0.8078(4) 0.4039(2) 0.71(3) Uani 0.0455(17) 1
  O2 O 0.7773(2) 0.5545(5) 0.34(3) Uani 0.0371(16) 1
  O3 O 0.6308(3) 0.7091(4) 0.56(3) Uani 0.0380(13) 1
  C1 C 0.666667 0.333333 0.72(3) Uani 0.028(3) 1
  O4 O 0.1392(4) 0.0696(2) 0.35(3) Uani 0.054(2) 1
  C2 C 0 0 0.36(3) Uani 0.027(2) 1
  C3 C 0.3944(5) 0.1972(3) 0.16(3) Uani 0.0241(17) 1 
