# Supplementary material for: High-pressure and high-temperature structure and equation of state of Na&lt;sub&gt;3&lt;/sub&gt;Ca&lt;sub&gt;2&lt;/sub&gt;La(CO&lt;sub&gt;3&lt;/sub&gt;)&lt;sub&gt;5&lt;/sub&gt; burbankite
Source: Copernicus journal article supplement (doi:10.5194/ejm-34-351-2022), 2022-06-13
Supplement: Supplementary file 2 [file ejm-34-351-2022-supplement.zip › supplement/supplement_postproduction.pdf]

**Table S1. Anisotropic displacement parameters ( $\text{\AA}^2$ ) at ambient conditions of the burbankite studied in this work.**

|                   | $U^{11}$    | $U^{22}$   | $U^{33}$   | $U^{23}$    | $U^{13}$     | $U^{12}$    |
|-------------------|-------------|------------|------------|-------------|--------------|-------------|
| <i>A</i> (Na, Ca) | 0.0145(8)   | 0.0182(10) | 0.0197(10) | -0.0007(7)  | -0.0003(3)   | 0.0091(5)   |
| <i>B</i> (Ca, La) | 0.01207(18) | 0.0152(2)  | 0.0116(2)  | -0.0009(3)  | -0.00043(17) | 0.00762(12) |
| <i>C</i> (1)      | 0.0178(18)  | 0.0178(18) | 0.007(4)   | 0           | 0            | 0.0089(9)   |
| <i>C</i> (2)      | 0.017(2)    | 0.017(2)   | 0.012(3)   | 0           | 0            | 0.0083(10)  |
| <i>C</i> (3)      | 0.0090(16)  | 0.0126(12) | 0.016(3)   | 0.0010(8)   | 0.0020(16)   | 0.0045(8)   |
| <i>O</i> (1)      | 0.0164(14)  | 0.0315(13) | 0.0185(19) | -0.0008(9)  | -0.0017(18)  | 0.0082(7)   |
| <i>O</i> (2)      | 0.0195(12)  | 0.0185(16) | 0.0145(15) | 0.0012(14)  | 0.0006(7)    | 0.0093(8)   |
| <i>O</i> (3)      | 0.0204(11)  | 0.0193(11) | 0.0212(11) | -0.0066(11) | -0.0033(10)  | 0.0134(10)  |
| <i>O</i> (4)      | 0.0132(16)  | 0.0323(17) | 0.039(2)   | 0.0016(8)   | 0.0033(17)   | 0.0066(8)   |

**Table S2. Interatomic distances (Å)  
selected from the structural  
refinement of the burbankite  
studied in this work.**

|              |           |
|--------------|-----------|
| A-O(1)       | 2.3869(1) |
| -O(1)        | 2.4616(1) |
| -O(2)        | 2.3579(1) |
| -O(2)        | 2.3587(1) |
| -O(3)        | 2.3815(1) |
| -O(3)        | 2.3819(1) |
| -O(3)        | 2.7084(1) |
| -O(3)        | 2.7087(1) |
| <A-O>        | 2.4692    |
| B-O(1)       | 2.7547(1) |
| -O(1)        | 2.7551(1) |
| -O(2)        | 2.4895(1) |
| -O(3)        | 2.4776(1) |
| -O(3)        | 2.4777(1) |
| -O(3)        | 2.6011(1) |
| -O(3)        | 2.6012(1) |
| -O(4)        | 2.6494(1) |
| -O(4)        | 2.6835(1) |
| -O(4)        | 2.6839(1) |
| <B-O>        | 2.6174    |
| C(1)-O(1) x3 | 1.2871(1) |
| C(2)-O(4) x3 | 1.2715(1) |
| C(3)-O(2)    | 1.2681(1) |
| -O(3) x2     | 1.2941(1) |
| <C(3)-O>     | 1.2854    |

**Table S3. Evolution with  $P$  of the  $V$  for the 8-fold and 10-fold coordinated polyhedra in burbankite structure.**

|           | 8-fold coordination<br>polyhedron | 10-fold<br>coordination<br>polyhedron |
|-----------|-----------------------------------|---------------------------------------|
| $P$ (GPa) | $V$ (Å <sup>3</sup> )             | $V$ (Å <sup>3</sup> )                 |
| 0.001     | 26.0118                           | 38.1327                               |
| 0.16      | 25.9677                           | 37.9823                               |
| 0.54      | 25.7201                           | 37.7399                               |
| 1.24      | 25.4523                           | 37.4934                               |
| 2.09      | 25.1469                           | 37.0552                               |
| 3.02      | 24.6685                           | 36.6828                               |
| 3.70      | 24.5768                           | 36.1478                               |
| 5.03      | 24.0418                           | 35.9333                               |
| 6.06      | 23.6888                           | 35.4887                               |
| 6.65      | 23.5320                           | 35.2665                               |
| 7.07      | 23.4016                           | 35.1863                               |

( $P$ -uncertainty:  $\pm 0.05$  GPa)

**Table S4. Evolution with  $T$  of the  $V$  for the 8-fold and 10-fold coordinated polyhedra in burbankite structure.**

|         | 8-fold coordination<br>polyhedron | 10-fold<br>coordination<br>polyhedron |
|---------|-----------------------------------|---------------------------------------|
| $T$ (K) | $V$ (Å <sup>3</sup> )             | $V$ (Å <sup>3</sup> )                 |
| 298     | 25.9868                           | 37.9708                               |
| 332     | 26.0632                           | 38.0622                               |
| 362     | 26.1034                           | 38.1461                               |
| 391     | 26.2531                           | 38.0354                               |
| 421     | 26.2819                           | 38.1681                               |
| 450     | 26.3212                           | 38.3796                               |
| 480     | 26.3768                           | 38.4898                               |
| 509     | 26.4732                           | 38.5476                               |
| 539     | 26.5496                           | 38.6021                               |
| 568     | 26.6186                           | 38.6775                               |
| 598     | 26.5599                           | 38.7516                               |
| 628     | 26.6047                           | 38.9862                               |

( $T$ -uncertainty:  $\pm 1$  K)

Figure S1

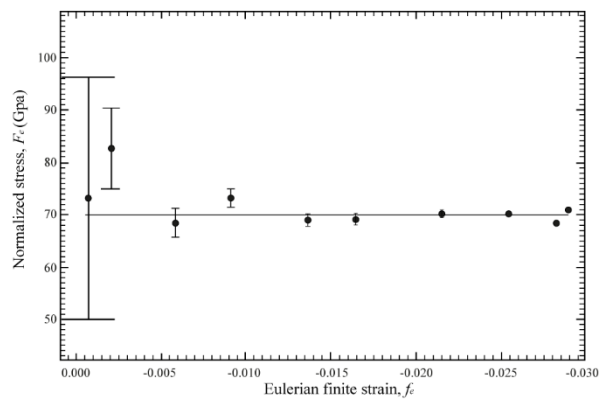

**Figure S1. Normalized pressure ( $F_e$ ) vs. Eulerian finite strain ( $f_e$ ) plot for burbankite. The solid lines are weighted linear fits to the data.**

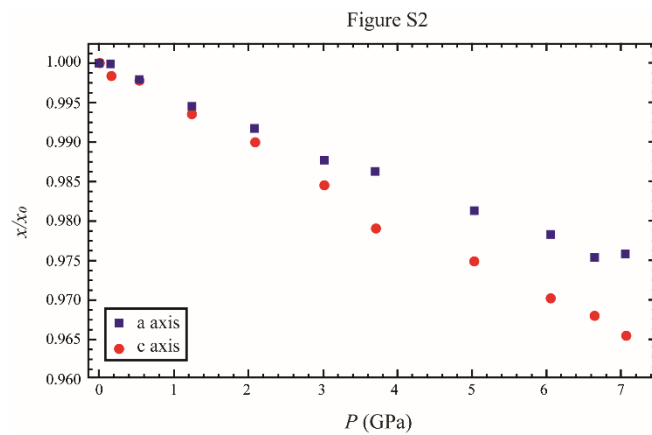

**Figure S2. Axial compressibility of a (blue squares) and c (orange circles) axis. A axis is less compressible with respect to c axis. Error bars are within symbols.**

Figure S3

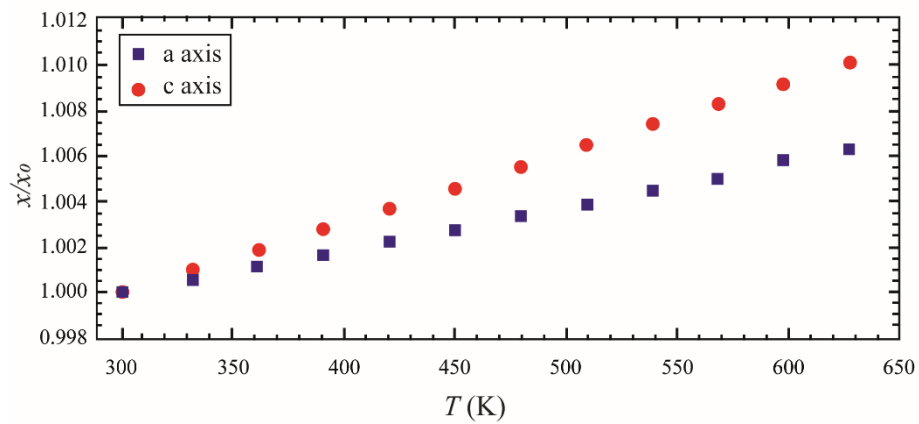

**Figure S3.** Axial thermal expansion of (blue squares) and c (orange circles) axis. The thermal behavior of the axes with  $T$  indicate a large anisotropy, with a axis less expandible with respect to c axis. Error bars are within symbols.
